# Supplementary material for: A case of blackwater fever with persistent Plasmodium falciparum parasitaemia detected by PCR after artemether–lumefantrine treatment
Source: Springer Nature journal article supplement (doi:10.1186/s12936-018-2180-1), 2018-01-16

## Additional file 2: Results of gametocyte-specific PCRs' assays

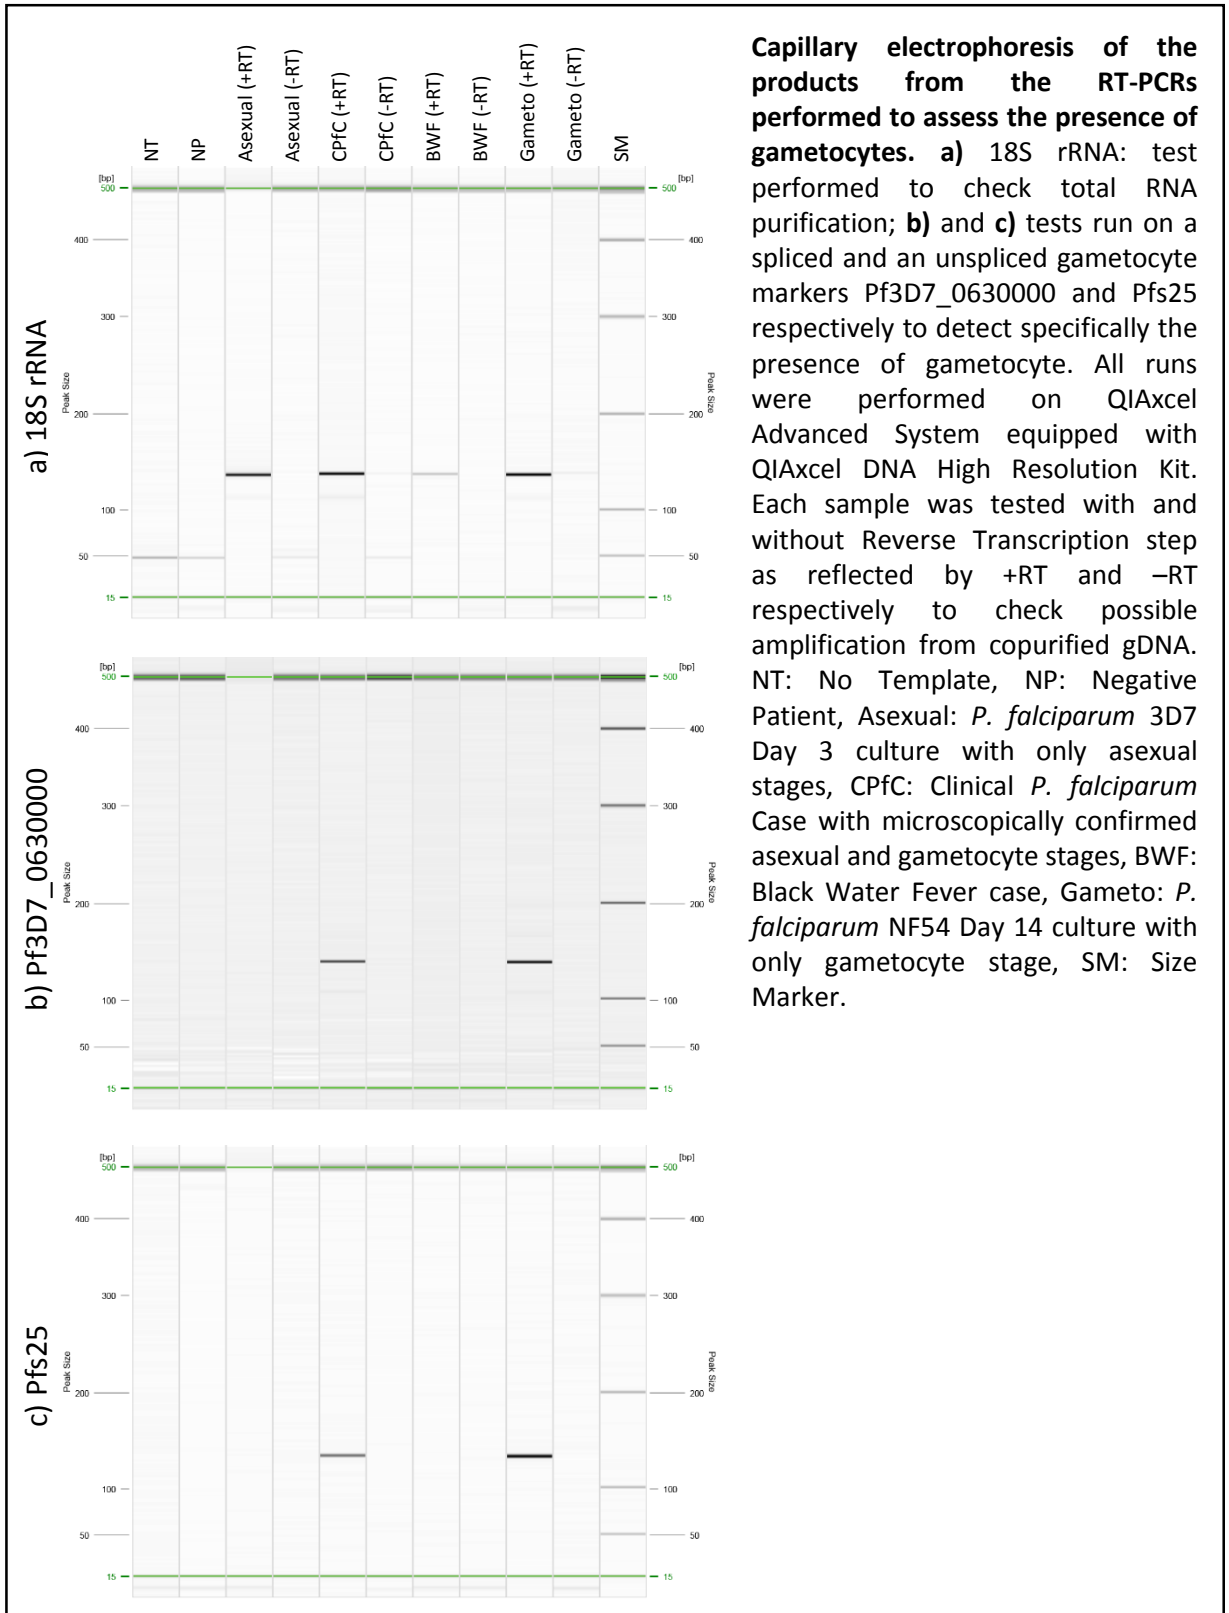

Supplement: MOESM2 [file 15368674]
